# Supplementary material
Source: Springer Nature journal article supplement (https://www.springermedizin.de/resource/supplementary/12936_2013_2761_MOESM3_ESM.pdf/9544194)

**A**

|             | Amino acid |     |     |     |
|-------------|------------|-----|-----|-----|
|             | 83         | 177 | 178 | 248 |
| Sal I       | T          | R   | P   | D   |
| Haplotype 1 | A          | S   | •   | E   |
| Haplotype 2 | A          | S   | L   | E   |
| Iran        | A          | S/R | •   | •   |

**B**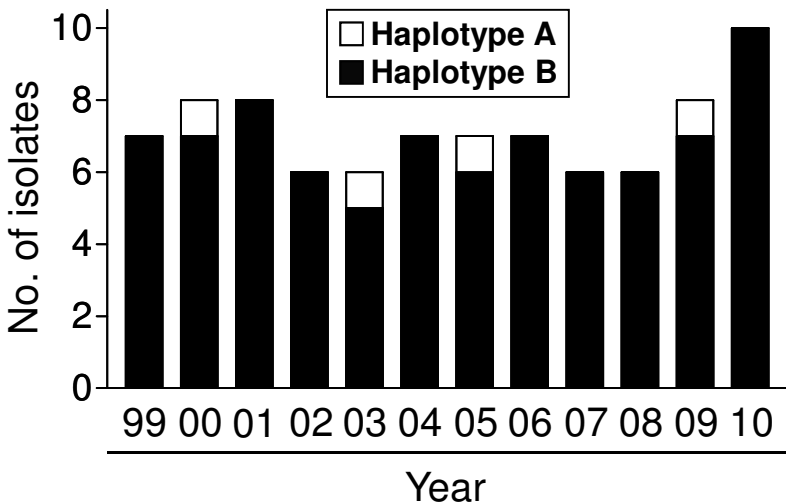

Supplement: MOESM3 [file 9544194]
